# Supplementary material for: Relationship Between Histological Features of Non-alcoholic Fatty Liver Disease and Ectopic Fat on Magnetic Resonance Imaging in Children and Adolescents
Source: Frontiers journal article supplement (doi:10.3389/fped.2021.685795), 2021-06-10
Supplement: Table_1.pdf [file Table_1.pdf]

Supplementary Table 1. Comparison of demographic, anthropometric, laboratory, and magnetic resonance imaging-measured fat fraction findings between non-obese NAFLD and obese NAFLD

|                              | BMI < 95th percentile<br>(n = 18) | BMI ≥ 95th percentile<br>(n = 45) | P-value |
|------------------------------|-----------------------------------|-----------------------------------|---------|
| Sex (boys : girls)           | 13 (72.2%) : 5 (27.8%)            | 35 (77.8%) : 10 (22.2%)           | 0.746*  |
| Age, yr                      | 12.3 (9.2–18.2)                   | 12.7 (5.6–19.3)                   | 0.648   |
| Height (cm)                  | 148.9 (138.2–177.5)               | 157.6 (122.4–184.7)               | 0.146   |
| Height z-score               | 0.36 (-3.40–1.68)                 | 0.98 (-1.78–2.82)                 | 0.033   |
| Weight (kg)                  | 49.6 (39.2–82.5)                  | 72.8 (36.4–130.9)                 | < 0.001 |
| Weight z-score               | 1.14 (-2.80–1.96)                 | 2.60 (0.99–5.01)                  | < 0.001 |
| WC (cm)                      | 81.5 (67.0–90.0)                  | 94.0 (75.0–120.0)                 | < 0.001 |
| WHtR                         | 0.53 (0.46–0.60)                  | 0.61 (0.52–0.69)                  | < 0.001 |
| BMI                          | 22.6 (18.6–26.2)                  | 28.9 (23.8–38.4)                  | < 0.001 |
| BMI z-score                  | 1.39 (-1.10–1.66)                 | 2.93 (1.62–5.10)                  | < 0.001 |
| Fat mass (kg)                | 17.3 (8.2–26.1)                   | 26.4 (12.6–54.0)                  | < 0.001 |
| Fat mass (%)                 | 33.0 (22.3–45.1)                  | 37.2 (24.1–67.2)                  | 0.001   |
| FFM (kg)                     | 31.9 (27.6–59.6)                  | 42.9 (23.5–79.7)                  | 0.019   |
| FFM (%)                      | 67.1 (54.8–77.7)                  | 62.7 (32.8–75.8)                  | 0.001   |
| FMI                          | 7.2 (3.9–10.9)                    | 10.7 (6.2–18.8)                   | < 0.001 |
| FFMI                         | 14.7 (13.2–19.0)                  | 18.1 (9.2–23.4)                   | 0.001   |
| mSBP (mmHg)                  | 113.7 (100–128)                   | 120.0 (106–159)                   | 0.008   |
| mDBP (mmHg)                  | 62.8 (52–74)                      | 63.7 (52–90)                      | 0.115   |
| AST (IU/L)                   | 49.0 (21–226)                     | 58.0 (17–216)                     | 0.447   |
| ALT (IU/L)                   | 97.5 (20–331)                     | 128.0 (22–366)                    | 0.155   |
| AST/ALT                      | 0.53 (0.37–1.52)                  | 0.47 (0.28–1.26)                  | 0.086   |
| Total bilirubin (mg/dL)      | 0.6 (0.3–1.1)                     | 0.5 (0.2–1.3)                     | 0.866   |
| GGT (IU/L)                   | 35.5 (12–184)                     | 38.0 (12–158)                     | 0.732   |
| Total cholesterol (mg/dL)    | 179.5 (120–277)                   | 180.0 (105–275)                   | 0.377   |
| Triglyceride (mg/dL)         | 105.0 (48–364)                    | 124.0 (54–293)                    | 0.681   |
| HDL-C (mg/dL)                | 43.5 (37–67)                      | 46.0 (28–68)                      | 0.964   |
| LDL-C (mg/dL)                | 101.0 (61–168)                    | 112.0 (55–175)                    | 0.198   |
| FPG (mg/dL)                  | 92.5 (76–153)                     | 94.0 (71–270)                     | 0.867   |
| Insulin (mIU/L)              | 18.2 (4.6–46.3)                   | 22.4 (6.4–75.6)                   | 0.104   |
| HbA1c (%)                    | 5.3 (5.0–7.7)                     | 5.4 (5.0–13.5)                    | 0.711   |
| HOMA-IR                      | 4.2 (1.0–14.0)                    | 5.9 (2.0–17.0)                    | 0.121   |
| QUICKI                       | 0.31 (0.27–0.39)                  | 0.30 (0.26–0.34)                  | 0.121   |
| MRI HFF (%)                  | 21.8 (4.7–33.0)                   | 25.2 (6.4–49.9)                   | 0.077   |
| MRI PFF (%)                  | 3.0 (0.4–15.8)                    | 4.3 (1.0–26.9)                    | 0.359   |
| Central obese (n, %)         | 11 (61.1%)                        | 43 (95.6%)                        | 0.001*  |
| Normal BP / EBP + HTN (n, %) | 13 (72.2%) / 5 (27.8%)            | 25 (55.6%) / 20 (44.4%)           | 0.222†  |
| Dyslipidemia (n, %)          | 10 (55.6%)                        | 32 (71.1%)                        | 0.237†  |
| Normal / PreDM + DM (n, %)   | 11 (61.1%) / 7 (38.9%)            | 29 (64.4%) / 16 (35.6%)           | 0.804†  |
| MetS (n, %)                  | 4 (22.2%)                         | 21 (46.7%)                        | 0.073†  |

P-value was calculated by Mann Whitney U test. \*P-value was calculated by Fisher's exact test. †P-value was calculated by Chi-square test. Values are presented as median (range) or numbers (%).

WC, waist circumference; WHtR, waist circumference-to-height ratio; BMI, body mass index; FFM, fat-free mass; FMI, fat mass index = fat mass(kg)/height(m)<sup>2</sup>; FFMI, fat-free mass index = FFM(kg)/ height(m)<sup>2</sup>; mSBP, mean systolic blood pressure; mDBP, mean diastolic blood pressure; AST, aspartate aminotransferase; ALT, alanine aminotransferase; GGT,  $\gamma$ -glutamyl transferase; HDL-C, high density lipoprotein cholesterol; LDL-C, low density lipoprotein cholesterol; FPG, fasting plasma glucose; HbA1c, glycated hemoglobin; HOMA-IR, homeostatic model assessment of insulin resistance; QUICKI, Quantitative insulin sensitivity check index; MRI, magnetic resonance imaging; HFF, hepatic fat fraction; PFF, pancreatic fat fraction; BP, blood pressure; EBP, elevated BP; HTN, hypertension; DM, diabetes mellitus; PreDM, prediabetes; MetS, metabolic syndrome

Supplementary Table 2. Comparison of proportion of histologic steatosis, inflammation, ballooning and fibrosis between non-obese NAFLD and obese NAFLD

|                                 | Non-obese<br>NAFLD<br>(n = 18) | Obese<br>NAFLD<br>(n = 45) | Total<br>(n = 63) | <i>P</i> -value |
|---------------------------------|--------------------------------|----------------------------|-------------------|-----------------|
| Steatosis grade 1               | 6 (33.3%)                      | 7 (15.6%)                  | 13 (20.6%)        | 0.016*          |
| Steatosis grade 2               | 8 (44.4%)                      | 10 (22.2%)                 | 18 (28.6%)        |                 |
| Steatosis grade 3               | 4 (22.2%)                      | 28 (62.2%)                 | 32 (50.8%)        |                 |
| Lobular Inflammation grade 1    | 11 (61.1%)                     | 21 (46.7%)                 | 32 (50.8%)        | 0.529           |
| Lobular Inflammation grade 2    | 7 (38.9%)                      | 22 (48.9%)                 | 29 (46.0%)        |                 |
| Lobular Inflammation grade 3    | 0                              | 2 (4.4%)                   | 2 (3.2%)          |                 |
| Portal Inflammation grade 0     | 5 (27.8%)                      | 19 (42.2%)                 | 24 (38.1%)        | 0.564           |
| Portal Inflammation grade 1     | 13 (72.2%)                     | 25 (55.6%)                 | 38 (60.3%)        |                 |
| Portal Inflammation grade 2     | 0                              | 1 (2.2%)                   | 1 (1.6%)          |                 |
| Portal Inflammation grade 0     | 5 (27.8%)                      | 19 (42.2%)                 | 24 (38.1%)        | 0.286*          |
| Portal Inflammation grade 1+2   | 13 (72.2%)                     | 26 (57.8%)                 | 39 (61.9%)        |                 |
| Ballooning degeneration grade 1 | 10 (55.6%)                     | 23 (51.1%)                 | 33 (52.4%)        | 0.848           |
| Ballooning degeneration grade 2 | 6 (33.3%)                      | 18 (40.0%)                 | 24 (38.1%)        |                 |
| Ballooning degeneration grade 3 | 2 (11.1%)                      | 4 (8.9%)                   | 6 (9.5%)          |                 |
| Fibrosis stage 0                | 2 (11.1%)                      | 9 (20.0%)                  | 11 (17.5%)        | 0.133           |
| Fibrosis stage 1                | 10 (55.6%)                     | 31 (68.9%)                 | 41 (65.1%)        |                 |
| Fibrosis stage 2                | 6 (33.3%)                      | 5 (11.1%)                  | 11 (17.5%)        |                 |

Non-obese means body mass index < 95th percentile and obese means body mass index ≥ 95th percentile. *P*-value was calculated by Fisher's exact test. \**P*-value was calculated by *Chi*-square test.
